# Supplementary material for: Comparative efficiency of TiO2 nanoparticles in suspension vs. immobilization into P(VDF–TrFE) porous membranes
Source: Royal Society of Chemistry journal article supplement (doi:10.1039/c5ra25385c), 2016-01-01
Supplement: c5ra25385c1.pdf [file c5ra25385c1.pdf]

## Supplementary material

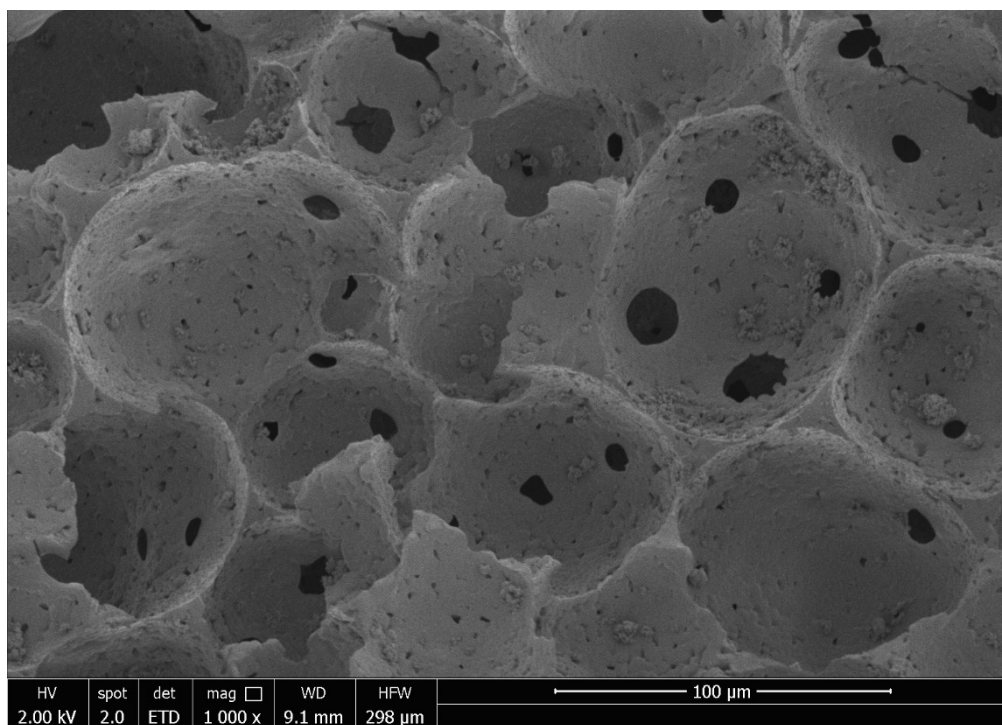

**Figure 1** - Cross-section SEM image of P(VDF-TrFE) membrane, 8 % TiO<sub>2</sub>/P(VDF-TrFE) with 3 % NaY.
